# Supplementary material for: Graphical tools for the planning and interpretation of polyurethane foam based passive air sampling campaigns
Source: Royal Society of Chemistry journal article supplement (doi:10.1039/d1em00559f), 2022-01-01
Supplement: d1em00559f1.pdf [file d1em00559f1.pdf]

## Graphical Tools for the Planning and Interpretation of Polyurethane Foam Based Passive Air Sampling Campaigns

Yuening Li, James M. Armitage and Frank Wania \*

*Department of Physical and Environmental Sciences, University of Toronto Scarborough, 1265 Military Trail, Toronto, Ontario, Canada M1C 1A4*

\*Corresponding author: [frank.wania@utoronto.ca](mailto:frank.wania@utoronto.ca), +1-416-287-7225

### Content

Text on the estimation of particle-gas equilibrium partitioning ratios  $K_{Q/G}$

Table S1 Abraham solute descriptors for selected native SVOCs.

Table S2 Abraham solute descriptors for selected DCs

Table S3 Partition coefficients between PUF and the gas phase  $K_{PUF/G}$  and their temperature dependence  $\Delta U_{PUF/G}$  estimated for selected SVOCs using the ppLFERs.

Table S4 Molecular weights, partition coefficients between PUF and the gas phase  $K_{PUF/G}$  and their temperature dependence  $\Delta U_{PUF/G}$  for selected depuration compounds

Table S5 Partition coefficients between atmospheric particles and the gas phase  $K_{Q/G}$  and their temperature dependence  $\Delta U_{Q/G}$  estimated for selected SVOCs using the ppLFERs.

The following poly-parameter linear free energy relationships (ppLFERs) were used to estimate the  $K_{Q/G}$  at 15 °C:<sup>29</sup>

$$\log K_{Q/G} \text{ 15 °C (Berlin (winter))} = 1.38S + 3.21A + 0.63L + 0.98V - 7.24 + \log \rho_{Q1} \quad (S1)$$

$$\log K_{Q/G} \text{ 15 °C (Dübendorf (winter))} = 1.63S + 3.20A + 0.51L + 1.51V - 7.33 + \log \rho_{Q2} \quad (S2)$$

$$\log K_{Q/G} \text{ 15 °C (Aspvreten)} = 0.95S + 2.52A + 0.64L + 0.49V - 5.95 + \log \rho_{Q3} \quad (S3)$$

$$\log K_{Q/G} \text{ 15 °C (Roost)} = 1.45S + 3.12A + 0.60L + 0.86V - 6.99 + \log \rho_{Q4} \quad (S4)$$

The original ppLFERs yield  $K_{Q/Gas}$  in units of  $m^3 g^{-1}$  and the last terms in Eqs. (S1-4) containing the density of the particles convert the  $K$  into units of  $m^3 m^{-3}$ . We used densities  $\rho_{Q1}$  to  $\rho_{Q4}$  of 1784000, 1784000, 1728000 and 1588000  $g m^{-3}$ , respectively.  $\log K_{Q/G}$  of a chemical at 15 °C was the mean of the values calculated using Eqs. (S1-4). The internal energy of phase transfer between particle and the gas phase ( $\Delta U_{Q/G}$ ) of a compound was assumed equal to the corresponding  $\Delta U_{PUF/G}$ .<sup>28</sup>

Table S1 Abraham solute descriptors for selected native SVOCs.

| <b>Chemical</b>                    | <b>E</b> | <b>S</b> | <b>A</b> | <b>B</b> | <b>L</b> | <b>V</b> |
|------------------------------------|----------|----------|----------|----------|----------|----------|
| Naphthalene                        | 1.34     | 0.9200   | 0        | 0.2000   | 5.1610   | 1.0854   |
| Phenanthrene                       | 2.06     | 1.2900   | 0        | 0.2600   | 7.6320   | 1.4544   |
| Pyrene                             | 2.81     | 1.7100   | 0        | 0.2800   | 8.8330   | 1.5846   |
| Chrysene                           | 3.03     | 1.7300   | 0        | 0.3300   | 10.3340  | 1.8234   |
| Benzo(a)pyrene                     | 3.625    | 1.9800   | 0        | 0.4400   | 11.7360  | 1.9536   |
| PCB 1                              | 1.48     | 1.07     | 0        | 0.2      | 6.338    | 1.4466   |
| PCB 11                             | 1.66     | 1.18     | 0        | 0.16     | 7.477    | 1.569    |
| PCB 16                             | 1.75     | 1.35     | 0        | 0.17     | 7.647    | 1.6914   |
| PCB-28                             | 1.76     | 1.3300   | 0        | 0.1500   | 7.9040   | 1.6910   |
| PCB-52                             | 1.9      | 1.4800   | 0        | 0.1500   | 8.1440   | 1.8140   |
| PCB-101                            | 2.04     | 1.6100   | 0        | 0.1300   | 8.8680   | 1.9360   |
| PCB-118                            | 2.06     | 1.5900   | 0        | 0.1100   | 9.3960   | 1.9360   |
| PCB-138                            | 2.18     | 1.7400   | 0        | 0.1100   | 9.7720   | 2.0590   |
| PCB-153                            | 2.18     | 1.7400   | 0        | 0.1100   | 9.5870   | 2.0590   |
| PCB-180                            | 2.29     | 1.8700   | 0        | 0.0900   | 10.4150  | 2.1810   |
| PCB-194                            | 2.48     | 2.0000   | 0        | 0.0600   | 11.1860  | 2.3030   |
| BDE-47                             | 2.45     | 1.4500   | 0        | 0.3400   | 10.6600  | 2.0830   |
| BDE-99                             | 2.74     | 1.5100   | 0        | 0.4400   | 11.7100  | 2.2580   |
| BDE-100                            | 2.76     | 1.4800   | 0        | 0.4100   | 11.4800  | 2.2580   |
| BDE-153                            | 2.88     | 1.5400   | 0        | 0.5200   | 12.6500  | 2.4330   |
| HCB                                | 1.49     | 0.7500   | 0        | 0.0900   | 6.9860   | 1.4508   |
| alpha-HCH                          | 1.45     | 0.7300   | 0        | 0.7100   | 7.3170   | 1.5800   |
| beta-HCH                           | 1.45     | 0.8800   | 0        | 0.6900   | 7.4930   | 1.5800   |
| delta-HCH                          | 1.45     | 0.9400   | 0        | 0.6300   | 7.6260   | 1.5800   |
| gamma-HCH (Lindane)                | 1.45     | 0.9100   | 0        | 0.6800   | 7.4670   | 1.5800   |
| 4:2-FTOHs                          | -0.39    | -0.140   | 0.4000   | 0.3000   | 2.3070   | 1.1711   |
| 6:2-FTOHs                          | -0.7     | -0.390   | 0.4000   | 0.2800   | 2.5880   | 1.5233   |
| 8:2-FTOHs                          | -1.02    | -0.640   | 0.4000   | 0.2500   | 2.8680   | 1.8755   |
| 10:2-FTOHs                         | -1.33    | -0.890   | 0.4000   | 0.2300   | 3.1480   | 2.2277   |
| hexamethylcyclotrisiloxane (D3)    | -0.25    | 0.0100   | 0        | 0.5100   | 3.6230   | 1.7500   |
| octamethylcyclotetrasiloxane (D4)  | -0.47    | -0.080   | 0        | 0.3200   | 4.4730   | 2.3450   |
| decamethylcyclopentasiloxane (D5)  | -0.7     | -0.100   | 0        | 0.5000   | 5.2420   | 2.9310   |
| dodecamethylcyclohexasiloxane (D6) | -0.88    | -0.120   | 0        | 0.7400   | 6.0800   | 3.5170   |
| Hexachlorobutadiene                | 1.02     | 0.42     | 0        | 0.16     | 5.347    | 1.3206   |
| 2,4,6-tribromoanisole              | 1.55     | 1.12     | 0        | 0.21     | 7.085    | 1.441    |
| Pentachloroanisole                 | 1.42     | 1.07     | 0        | 0.04     | 7.566    | 1.528    |
| triethyl phosphate                 | 0        | 1.12     | 0        | 1.05     | 5.04     | 1.3934   |

Table S2 Abraham solute descriptors for selected DCs

| <b>Chemical</b> | <b>E</b> | <b>S</b> | <b>A</b> | <b>B</b> | <b>V</b> | <b>L</b> |
|-----------------|----------|----------|----------|----------|----------|----------|
| PCB 30          | 1.74     | 1.35     | 0        | 0.17     | 1.6914   | 7.286    |
| PCB 54          | 1.84     | 1.48     | 0        | 0.15     | 1.8138   | 7.753    |
| PCB 107         | 2.07     | 1.59     | 0        | 0.11     | 1.9362   | 9.334    |
| PCB 108         | 2.04     | 1.59     | 0        | 0.11     | 1.9362   | 9.349    |
| PCB 198         | 2.46     | 2        | 0        | 0.06     | 2.3034   | 10.583   |
| 13C-PCB 3       | 1.5      | 1.05     | 0        | 0.18     | 1.4466   | 6.718    |
| 13C-PCB 9       | 1.63     | 1.2      | 0        | 0.18     | 1.569    | 7.001    |
| 13C-PCB 15      | 1.64     | 1.18     | 0        | 0.16     | 1.569    | 7.58     |
| 13C-PCB 28      | 1.76     | 1.33     | 0        | 0.15     | 1.6914   | 7.904    |
| 13C-PCB 31      | 1.77     | 1.33     | 0        | 0.15     | 1.6914   | 7.862    |
| 13C-PCB 32      | 1.74     | 1.35     | 0        | 0.17     | 1.6914   | 7.667    |
| 13C-PCB 101     | 2.04     | 1.61     | 0        | 0.13     | 1.9362   | 8.868    |
| 13C-PCB 111     | 2.08     | 1.59     | 0        | 0.11     | 1.9362   | 9.082    |
| 13C-PCB 118     | 2.06     | 1.59     | 0        | 0.11     | 1.9362   | 9.396    |
| 13C-HCB         | 1.49     | 0.75     | 0        | 0.09     | 1.4508   | 6.986    |
| d6-gamma-HCH    | 1.45     | 0.91     | 0        | 0.68     | 1.5798   | 7.467    |

Table S3 Partition coefficients between PUF and the gas phase  $K_{\text{PUF/G}}$  and their temperature dependence  $\Delta U_{\text{PUF/G}}$  estimated for selected SVOCs using the ppLFRs.

| Chemical                           | log $K_{\text{PUF/G}}$ |           |         |          |          | $\Delta U_{\text{PUF/G}}$<br>(J·mol <sup>-1</sup> ) |
|------------------------------------|------------------------|-----------|---------|----------|----------|-----------------------------------------------------|
|                                    | At -40 °C              | At -15 °C | At 5 °C | At 25 °C | At 50 °C |                                                     |
| Naphthalene                        | 5.76                   | 4.73      | 4.05    | 3.45     | 2.81     | -47182                                              |
| Phenanthrene                       | 9.15                   | 7.65      | 6.65    | 5.78     | 4.84     | -69042                                              |
| Pyrene                             | 11.33                  | 9.52      | 8.31    | 7.26     | 6.13     | -83265                                              |
| Chrysene                           | 12.91                  | 10.89     | 9.54    | 8.36     | 7.10     | -93128                                              |
| Benzo(a)pyrene                     | 14.87                  | 12.59     | 11.05   | 9.73     | 8.30     | -105223                                             |
| PCB 1                              | 7.46                   | 6.17      | 5.30    | 4.55     | 3.75     | -59506                                              |
| PCB 11                             | 8.84                   | 7.37      | 6.38    | 5.52     | 4.60     | -67907                                              |
| PCB 16                             | 9.50                   | 7.91      | 6.84    | 5.92     | 4.93     | -73196                                              |
| PCB-28                             | 9.68                   | 8.08      | 7.00    | 6.07     | 5.07     | -73944                                              |
| PCB-52                             | 10.35                  | 8.63      | 7.48    | 6.48     | 5.41     | -79191                                              |
| PCB-101                            | 11.41                  | 9.54      | 8.29    | 7.20     | 6.03     | -86154                                              |
| PCB-118                            | 11.83                  | 9.92      | 8.64    | 7.53     | 6.34     | -88072                                              |
| PCB-138                            | 12.63                  | 10.59     | 9.22    | 8.04     | 6.77     | -93903                                              |
| PCB-153                            | 12.46                  | 10.44     | 9.09    | 7.91     | 6.65     | -93108                                              |
| PCB-180                            | 13.61                  | 11.43     | 9.97    | 8.70     | 7.34     | -100518                                             |
| PCB-194                            | 14.71                  | 12.37     | 10.81   | 9.45     | 7.99     | -107683                                             |
| BDE-47                             | 12.75                  | 10.73     | 9.38    | 8.21     | 6.95     | -92925                                              |
| BDE-99                             | 13.97                  | 11.79     | 10.32   | 9.05     | 7.69     | -100736                                             |
| BDE-100                            | 13.70                  | 11.54     | 10.10   | 8.85     | 7.51     | -99219                                              |
| BDE-153                            | 15.03                  | 12.70     | 11.13   | 9.78     | 8.32     | -107546                                             |
| HCB                                | 7.28                   | 6.05      | 5.22    | 4.51     | 3.74     | -56714                                              |
| alpha-HCH                          | 7.63                   | 6.34      | 5.48    | 4.73     | 3.93     | -59439                                              |
| beta-HCH                           | 8.15                   | 6.79      | 5.87    | 5.08     | 4.23     | -62836                                              |
| delta-HCH                          | 8.41                   | 7.01      | 6.07    | 5.26     | 4.39     | -64464                                              |
| gamma-HCH (Lindane)                | 8.20                   | 6.83      | 5.90    | 5.11     | 4.25     | -63252                                              |
| 4:2-FTOHs                          | 2.90                   | 2.12      | 1.60    | 1.14     | 0.66     | -35991                                              |
| 6:2-FTOHs                          | 2.85                   | 2.04      | 1.49    | 1.02     | 0.52     | -37307                                              |
| 8:2-FTOHs                          | 2.79                   | 1.95      | 1.39    | 0.90     | 0.38     | -38619                                              |
| 10:2-FTOHs                         | 2.73                   | 1.86      | 1.28    | 0.78     | 0.24     | -39931                                              |
| hexamethylcyclotrisiloxane (D3)    | 2.76                   | 2.04      | 1.56    | 1.14     | 0.69     | -33059                                              |
| octamethylcyclotetrasiloxane (D4)  | 3.79                   | 2.86      | 2.24    | 1.70     | 1.12     | -42746                                              |
| decamethylcyclopentasiloxane (D5)  | 4.91                   | 3.75      | 2.98    | 2.31     | 1.59     | -53202                                              |
| dodecamethylcyclohexasiloxane (D6) | 6.09                   | 4.70      | 3.77    | 2.96     | 2.10     | -63954                                              |
| Hexachlorobutadiene (HCBD)         | 4.92                   | 4.01      | 3.39    | 2.86     | 2.29     | -42192                                              |
| 2,4,6-tribromoanisole (TBA)        | 8.24                   | 6.86      | 5.94    | 5.14     | 4.28     | -63527                                              |
| Pentachloroanisole (PCA)           | 8.62                   | 7.20      | 6.24    | 5.41     | 4.52     | -65829                                              |
| triethyl phosphate (TP)            | 6.38                   | 5.20      | 4.41    | 3.73     | 3.00     | -54124                                              |

Table S4 Molecular weights, partition coefficients between PUF and the gas phase  $K_{\text{PUF/G}}$  and their temperature dependence  $\Delta U_{\text{PUF/G}}$  for selected deuration compounds

| DCs          | MW<br>(g/mol) | log $K_{\text{PUF/G}}$ |        |       |       |       | $\Delta U_{\text{PUF/G}}$<br>(J/mol) |
|--------------|---------------|------------------------|--------|-------|-------|-------|--------------------------------------|
|              |               | -40 °C                 | -15 °C | 5 °C  | 25 °C | 50 °C |                                      |
| PCB 30       | 257.5         | 9.18                   | 7.62   | 6.58  | 5.68  | 4.70  | -71644                               |
| PCB 54       | 292           | 10.00                  | 8.32   | 7.19  | 6.22  | 5.17  | -77507                               |
| PCB 107      | 326.4         | 11.78                  | 9.87   | 8.59  | 7.49  | 6.30  | -87808                               |
| PCB 108      | 326.4         | 11.79                  | 9.88   | 8.61  | 7.50  | 6.31  | -87872                               |
| PCB 198      | 429.8         | 14.17                  | 11.89  | 10.36 | 9.04  | 7.61  | -105095                              |
| 13C-PCB 3    | 200.65        | 7.75                   | 6.43   | 5.55  | 4.78  | 3.96  | -60788                               |
| 13C-PCB 9    | 235.09        | 8.46                   | 7.03   | 6.06  | 5.23  | 4.33  | -66212                               |
| 13C-PCB 15   | 235.09        | 8.93                   | 7.45   | 6.46  | 5.59  | 4.67  | -68350                               |
| 13C-PCB 28   | 269.5         | 9.68                   | 8.08   | 7.00  | 6.07  | 5.07  | -73949                               |
| 13C-PCB 31   | 269.5         | 9.64                   | 8.04   | 6.97  | 6.04  | 5.04  | -73769                               |
| 13C-PCB 32   | 269.5         | 9.52                   | 7.93   | 6.86  | 5.94  | 4.94  | -73282                               |
| 13C-PCB 101  | 338.4         | 11.41                  | 9.54   | 8.29  | 7.20  | 6.03  | -86156                               |
| 13C-PCB 111  | 338.4         | 11.55                  | 9.67   | 8.41  | 7.32  | 6.14  | -86724                               |
| 13C-PCB 118  | 338.4         | 11.83                  | 9.92   | 8.64  | 7.53  | 6.34  | -88074                               |
| 13C-HCB      | 290.8         | 7.28                   | 6.05   | 5.22  | 4.51  | 3.74  | -56714                               |
| d6-gamma-HCH | 296.8         | 8.20                   | 6.82   | 5.90  | 5.11  | 4.25  | -63250                               |

Table S5 Partition coefficients between atmospheric particles and the gas phase  $K_{Q/G}$  and their temperature dependence  $\Delta U_{Q/G}$  estimated for selected SVOCs using the ppLFERS.

| Chemical                           | log $K_{Q/G}$ |           |         |          |          | $\Delta U_{Q/G}$<br>(J·mol <sup>-1</sup> ) |
|------------------------------------|---------------|-----------|---------|----------|----------|--------------------------------------------|
|                                    | At -40 °C     | At -15 °C | At 5 °C | At 25 °C | At 50 °C |                                            |
| Naphthalene                        | 6.81          | 5.79      | 5.10    | 4.51     | 3.87     | -47182                                     |
| Phenanthrene                       | 10.10         | 8.60      | 7.60    | 6.73     | 5.79     | -69042                                     |
| Pyrene                             | 12.12         | 10.31     | 9.10    | 8.05     | 6.93     | -83265                                     |
| Chrysene                           | 13.71         | 11.69     | 10.34   | 9.16     | 7.90     | -93128                                     |
| Benzo(a)pyrene                     | 15.57         | 13.29     | 11.76   | 10.43    | 9.01     | -105223                                    |
| PCB 1                              | 8.59          | 7.30      | 6.43    | 5.68     | 4.88     | -59506                                     |
| PCB 11                             | 9.88          | 8.40      | 7.42    | 6.56     | 5.64     | -67907                                     |
| PCB 16                             | 10.56         | 8.97      | 7.90    | 6.98     | 5.99     | -73196                                     |
| PCB-28                             | 10.71         | 9.10      | 8.03    | 7.09     | 6.09     | -73944                                     |
| PCB-52                             | 11.39         | 9.68      | 8.52    | 7.53     | 6.45     | -79191                                     |
| PCB-101                            | 12.41         | 10.54     | 9.28    | 8.20     | 7.03     | -86154                                     |
| PCB-118                            | 12.77         | 10.86     | 9.58    | 8.47     | 7.27     | -88072                                     |
| PCB-138                            | 13.56         | 11.52     | 10.16   | 8.98     | 7.70     | -93903                                     |
| PCB-153                            | 13.42         | 11.40     | 10.04   | 8.87     | 7.61     | -93108                                     |
| PCB-180                            | 14.51         | 12.33     | 10.87   | 9.60     | 8.24     | -100518                                    |
| PCB-194                            | 15.56         | 13.22     | 11.66   | 10.30    | 8.84     | -107683                                    |
| BDE-47                             | 13.77         | 11.76     | 10.40   | 9.23     | 7.97     | -92925                                     |
| BDE-99                             | 15.02         | 12.84     | 11.37   | 10.10    | 8.74     | -100736                                    |
| BDE-100                            | 14.77         | 12.61     | 11.17   | 9.92     | 8.58     | -99219                                     |
| BDE-153                            | 16.11         | 13.78     | 12.21   | 10.86    | 9.40     | -107546                                    |
| HCB                                | 8.38          | 7.15      | 6.33    | 5.61     | 4.84     | -56714                                     |
| alpha-HCH                          | 9.04          | 7.76      | 6.89    | 6.14     | 5.34     | -59439                                     |
| beta-HCH                           | 9.49          | 8.13      | 7.21    | 6.42     | 5.57     | -62836                                     |
| delta-HCH                          | 9.70          | 8.30      | 7.36    | 6.55     | 5.67     | -64464                                     |
| gamma-HCH (Lindane)                | 9.53          | 8.16      | 7.24    | 6.44     | 5.58     | -63252                                     |
| 4:2-FTOHs                          | 4.53          | 3.75      | 3.23    | 2.77     | 2.29     | -35991                                     |
| 6:2-FTOHs                          | 4.75          | 3.94      | 3.39    | 2.92     | 2.42     | -37307                                     |
| 8:2-FTOHs                          | 4.96          | 4.12      | 3.56    | 3.07     | 2.55     | -38619                                     |
| 10:2-FTOHs                         | 5.17          | 4.31      | 3.72    | 3.22     | 2.68     | -39931                                     |
| hexamethylcyclotrisiloxane (D3)    | 4.83          | 4.11      | 3.63    | 3.21     | 2.76     | -33059                                     |
| octamethylcyclotetrasiloxane (D4)  | 6.12          | 5.19      | 4.57    | 4.03     | 3.45     | -42746                                     |
| decamethylcyclopentasiloxane (D5)  | 7.63          | 6.48      | 5.70    | 5.03     | 4.31     | -53202                                     |
| dodecamethylcyclohexasiloxane (D6) | 9.22          | 7.84      | 6.91    | 6.10     | 5.23     | -63954                                     |
| Hexachlorobutadiene (HCBd)         | 6.24          | 5.33      | 4.71    | 4.18     | 3.61     | -42192                                     |
| 2,4,6-tribromoanisole (TBA)        | 9.27          | 7.89      | 6.97    | 6.17     | 5.31     | -63527                                     |
| Pentachloroanisole (PCA)           | 9.60          | 8.18      | 7.22    | 6.39     | 5.50     | -65829                                     |
| triethyl phosphate (TP)            | 7.95          | 6.77      | 5.99    | 5.31     | 4.57     | -54124                                     |
